# Supplementary material
Source: MDPI journal article supplement (https://www.mdpi.com/2075-163X/12/4/430)
Supplement: s1 [file s1]

**Table S2.** *Luinaite-(OH)*: selected bond distances (in Å) for schorl-1A from Cleveland tin mine, Australia (Sample LUI-AUS), and for oxy-dravite-1A from Blue Mountain Saddle, USA (Sample LUI-USA)

| Sample LUI-AUS |              |        |              |        |              |        |              |        |              |        |              |
|----------------|--------------|--------|--------------|--------|--------------|--------|--------------|--------|--------------|--------|--------------|
| X-O2C          | 2.516(4)     |        |              |        |              |        |              |        |              |        |              |
| X-O2A          | 2.531(4)     |        |              |        |              |        |              |        |              |        |              |
| X-O2B          | 2.553(4)     |        |              |        |              |        |              |        |              |        |              |
| X-O5A          | 2.751(5)     |        |              |        |              |        |              |        |              |        |              |
| X-O5B          | 2.768(5)     |        |              |        |              |        |              |        |              |        |              |
| X-O5C          | 2.768(4)     |        |              |        |              |        |              |        |              |        |              |
| X-O4C          | 2.781(5)     |        |              |        |              |        |              |        |              |        |              |
| X-O4B          | 2.820(4)     |        |              |        |              |        |              |        |              |        |              |
| X-O4A          | 2.844(5)     |        |              |        |              |        |              |        |              |        |              |
| <X-O>          | <b>2.704</b> |        |              |        |              |        |              |        |              |        |              |
|                |              |        |              |        |              |        |              |        |              |        |              |
| Ya-O2C         | 1.997(4)     | Yb-O2C | 1.964(4)     | Yc-O2A | 1.963(4)     |        |              |        |              |        |              |
| Ya-O2A         | 2.003(4)     | Yb-O2B | 1.981(4)     | Yc-O2B | 1.976(4)     |        |              |        |              |        |              |
| Ya-O6E         | 2.018(3)     | Yb-O6A | 1.994(3)     | Yc-O6C | 1.993(3)     |        |              |        |              |        |              |
| Ya-O6B         | 2.021(3)     | Yb-O6D | 2.005(3)     | Yc-O1A | 1.993(4)     |        |              |        |              |        |              |
| Ya-O1A         | 2.047(4)     | Yb-O1A | 2.008(4)     | Yc-O6F | 1.996(3)     |        |              |        |              |        |              |
| Ya-O3A         | 2.132(4)     | Yb-O3C | 2.091(4)     | Yc-O3B | 2.077(4)     |        |              |        |              |        |              |
| <Ya-O>         | <b>2.036</b> | <Yb-O> | <b>2.007</b> | <Yc-O> | <b>2.000</b> |        |              |        |              |        |              |
|                |              |        |              |        |              |        |              |        |              |        |              |
| Za-O8D         | 1.875(3)     | Zb-O8A | 1.889(3)     | Zc-O6E | 1.878(3)     | Zd-O8F | 1.911(3)     | Ze-O6B | 1.879(3)     | Zf-O7E | 1.913(3)     |
| Za-O7D         | 1.889(3)     | Zb-O7B | 1.901(3)     | Zc-O8B | 1.884(4)     | Zd-O6F | 1.913(3)     | Ze-O7F | 1.893(3)     | Zf-O6A | 1.913(3)     |
| Za-O6D         | 1.892(3)     | Zb-O6C | 1.908(3)     | Zc-O7C | 1.884(3)     | Zd-O7A | 1.921(3)     | Ze-O8C | 1.895(3)     | Zf-O8E | 1.923(3)     |
| Za-O8C         | 1.920(3)     | Zb-O8B | 1.940(3)     | Zc-O8E | 1.910(4)     | Zd-O8D | 1.961(3)     | Ze-O8F | 1.917(3)     | Zf-O8A | 1.952(3)     |
| Za-O7A         | 1.939(3)     | Zb-O7E | 1.956(3)     | Zc-O7B | 1.945(3)     | Zd-O7F | 1.990(3)     | Ze-O7D | 1.967(3)     | Zf-O7C | 1.992(3)     |
| Za-O3C         | 1.979(4)     | Zb-O3B | 1.992(4)     | Zc-O3A | 1.981(3)     | Zd-O3B | 2.014(4)     | Ze-O3A | 1.991(3)     | Zf-O3C | 2.022(4)     |
| <Za-O>         | <b>1.916</b> | <Zb-O> | <b>1.931</b> | <Zc-O> | <b>1.914</b> | <Zd-O> | <b>1.952</b> | <Ze-O> | <b>1.924</b> | <Zf-O> | <b>1.953</b> |
|                |              |        |              |        |              |        |              |        |              |        |              |
| Ta-O6A         | 1.607(3)     | Tb-O7A | 1.600(3)     | Tc-O7E | 1.601(3)     | Td-O7F | 1.601(3)     | Te-O7C | 1.604(3)     | Tf-O7D | 1.609(3)     |
| Ta-O7B         | 1.612(3)     | Tb-O6B | 1.606(3)     | Tc-O6E | 1.609(3)     | Td-O6D | 1.610(3)     | Te-O6C | 1.608(3)     | Tf-O6F | 1.610(3)     |
| Ta-O4A         | 1.623(3)     | Tb-O4A | 1.626(3)     | Tc-O4B | 1.623(4)     | Td-O4C | 1.622(3)     | Te-O4C | 1.625(3)     | Tf-O4B | 1.622(4)     |
| Ta-O5C         | 1.634(3)     | Tb-O5A | 1.637(3)     | Tc-O5A | 1.639(3)     | Td-O5C | 1.635(3)     | Te-O5B | 1.637(3)     | Tf-O5B | 1.638(3)     |
| <Ta-O>         | <b>1.619</b> | <Tb-O> | <b>1.617</b> | <Tc-O> | <b>1.618</b> | <Td-O> | <b>1.617</b> | <Te-O> | <b>1.619</b> | <Tf-O> | <b>1.620</b> |
|                |              |        |              |        |              |        |              |        |              |        |              |
| B1-O2A         | 1.360(5)     | B2-O2C | 1.372(6)     | B3-O2B | 1.361(6)     |        |              |        |              |        |              |
| B1-O8D         | 1.375(6)     | B2-O8A | 1.373(5)     | B3-O8B | 1.377(6)     |        |              |        |              |        |              |
| B1-O8E         | 1.378(6)     | B2-O8F | 1.382(6)     | B3-O8C | 1.383(5)     |        |              |        |              |        |              |
| <B1-O>         | <b>1.371</b> | <B2-O> | <b>1.376</b> | <B3-O> | <b>1.374</b> |        |              |        |              |        |              |

| Sample LUI-USA |              |        |              |        |              |        |              |        |              |        |              |
|----------------|--------------|--------|--------------|--------|--------------|--------|--------------|--------|--------------|--------|--------------|
| X-O2C          | 2.498(3)     |        |              |        |              |        |              |        |              |        |              |
| X-O2A          | 2.528(3)     |        |              |        |              |        |              |        |              |        |              |
| X-O2B          | 2.532(3)     |        |              |        |              |        |              |        |              |        |              |
| X-O5A          | 2.729(3)     |        |              |        |              |        |              |        |              |        |              |
| X-O5B          | 2.737(3)     |        |              |        |              |        |              |        |              |        |              |
| X-O5C          | 2.752(3)     |        |              |        |              |        |              |        |              |        |              |
| X-O4C          | 2.787(3)     |        |              |        |              |        |              |        |              |        |              |
| X-O4B          | 2.796(3)     |        |              |        |              |        |              |        |              |        |              |
| X-O4A          | 2.849(3)     |        |              |        |              |        |              |        |              |        |              |
| <X-O>          | <b>2.690</b> |        |              |        |              |        |              |        |              |        |              |
|                |              |        |              |        |              |        |              |        |              |        |              |
| Ya-O2C         | 1.959(2)     | Yb-O2C | 1.970(3)     | Yc-O2A | 1.942(3)     |        |              |        |              |        |              |
| Ya-O2A         | 1.971(2)     | Yb-O2B | 1.975(2)     | Yc-O2B | 1.959(2)     |        |              |        |              |        |              |
| Ya-O6E         | 1.977(2)     | Yb-O6A | 1.991(2)     | Yc-O6C | 1.959(2)     |        |              |        |              |        |              |
| Ya-O6B         | 1.980(2)     | Yb-O6D | 1.991(2)     | Yc-O1A | 1.967(2)     |        |              |        |              |        |              |
| Ya-O1A         | 1.991(2)     | Yb-O1A | 1.996(2)     | Yc-O6F | 1.975(2)     |        |              |        |              |        |              |
| Ya-O3A         | 2.080(3)     | Yb-O3C | 2.089(3)     | Yc-O3B | 2.039(3)     |        |              |        |              |        |              |
| <Ya-O>         | <b>1.993</b> | <Yb-O> | <b>2.002</b> | <Yc-O> | <b>1.974</b> |        |              |        |              |        |              |
|                |              |        |              |        |              |        |              |        |              |        |              |
| Za-O8D         | 1.879(2)     | Zb-O8A | 1.908(2)     | Zc-O6E | 1.883(2)     | Zd-O8F | 1.912(2)     | Ze-O6B | 1.908(2)     | Zf-O7E | 1.915(2)     |
| Za-O7D         | 1.896(2)     | Zb-O7B | 1.928(2)     | Zc-O8B | 1.895(2)     | Zd-O6F | 1.934(2)     | Ze-O7F | 1.915(2)     | Zf-O6A | 1.919(2)     |
| Za-O6D         | 1.899(2)     | Zb-O6C | 1.936(2)     | Zc-O7C | 1.903(2)     | Zd-O7A | 1.944(2)     | Ze-O8C | 1.920(2)     | Zf-O8E | 1.922(2)     |
| Za-O8C         | 1.909(2)     | Zb-O8B | 1.954(2)     | Zc-O8E | 1.907(2)     | Zd-O8D | 1.958(2)     | Ze-O8F | 1.924(2)     | Zf-O8A | 1.933(2)     |
| Za-O7A         | 1.931(2)     | Zb-O7E | 1.968(2)     | Zc-O7B | 1.933(2)     | Zd-O7F | 1.978(2)     | Ze-O7D | 1.975(2)     | Zf-O7C | 1.981(2)     |
| Za-O3C         | 1.980(2)     | Zb-O3B | 2.013(2)     | Zc-O3A | 1.983(2)     | Zd-O3B | 2.018(2)     | Ze-O3A | 2.018(2)     | Zf-O3C | 2.021(2)     |
| <Za-O>         | <b>1.916</b> | <Zb-O> | <b>1.951</b> | <Zc-O> | <b>1.917</b> | <Zd-O> | <b>1.957</b> | <Ze-O> | <b>1.943</b> | <Zf-O> | <b>1.949</b> |
|                |              |        |              |        |              |        |              |        |              |        |              |
| Ta-O6A         | 1.602(2)     | Tb-O7A | 1.601(2)     | Tc-O7E | 1.594(2)     | Td-O7F | 1.594(2)     | Te-O7C | 1.600(2)     | Tf-O7D | 1.601(2)     |
| Ta-O7B         | 1.607(2)     | Tb-O6B | 1.608(2)     | Tc-O6E | 1.609(2)     | Td-O6D | 1.610(2)     | Te-O6C | 1.610(2)     | Tf-O6F | 1.605(2)     |
| Ta-O4A         | 1.624(2)     | Tb-O4A | 1.626(2)     | Tc-O4B | 1.627(2)     | Td-O4C | 1.624(2)     | Te-O4C | 1.622(2)     | Tf-O4B | 1.622(2)     |
| Ta-O5C         | 1.641(2)     | Tb-O5A | 1.637(2)     | Tc-O5A | 1.638(2)     | Td-O5C | 1.640(2)     | Te-O5B | 1.640(2)     | Tf-O5B | 1.638(2)     |
| <Ta-O>         | <b>1.619</b> | <Tb-O> | <b>1.618</b> | <Tc-O> | <b>1.617</b> | <Td-O> | <b>1.617</b> | <Te-O> | <b>1.618</b> | <Tf-O> | <b>1.617</b> |
|                |              |        |              |        |              |        |              |        |              |        |              |
| B1-O2A         | 1.366(4)     | B2-O2C | 1.374(4)     | B3-O2B | 1.366(4)     |        |              |        |              |        |              |
| B1-O8D         | 1.378(4)     | B2-O8A | 1.375(4)     | B3-O8B | 1.376(4)     |        |              |        |              |        |              |
| B1-O8E         | 1.381(4)     | B2-O8F | 1.379(4)     | B3-O8C | 1.376(4)     |        |              |        |              |        |              |
| <B1-O>         | <b>1.375</b> | <B2-O> | <b>1.376</b> | <B3-O> | <b>1.373</b> |        |              |        |              |        |              |
