# Supplementary material
Source: MDPI journal article supplement (https://www.mdpi.com/2075-163X/12/4/430)
Supplement: s1 [file s1]

**Table S1.** *Luinaite-(OH)*: sites, fractional atomic coordinates, isotropic (\*) or equivalent-isotropic displacement parameters (in Å<sup>2</sup>), site occupancies (s.o.) for schorl-1A from Cleveland tin mine, Australia (Sample LUI-AUS), and for oxy-dravite-1A from Blue Mountain Saddle, USA (Sample LUI-USA).

| Site | Sample LUI-AUS |            |              |                            | S.O.                                          |
|------|----------------|------------|--------------|----------------------------|-----------------------------------------------|
|      | <i>x/a</i>     | <i>y/b</i> | <i>z/c</i>   | <i>U</i> <sub>eq/iso</sub> |                                               |
| X    | -0.0008(2)     | 0.0001(2)  | 0.2497(4)    | 0.0241(10)                 | Na <sub>0.711(10)</sub>                       |
| Ya   | 0.60395(5)     | 0.39544(6) | -0.01761(11) | 0.0102(2)                  | Al <sub>0.475(7)</sub> Fe <sub>0.525(7)</sub> |
| Yb   | 0.79092(6)     | 0.39574(7) | -0.01598(12) | 0.0101(3)                  | Al <sub>0.592(7)</sub> Fe <sub>0.408(7)</sub> |
| Yc   | 0.60348(6)     | 0.20819(7) | -0.01537(12) | 0.0097(3)                  | Al <sub>0.637(7)</sub> Fe <sub>0.363(7)</sub> |
| Za   | 0.63075(8)     | 0.70298(9) | 0.29721(16)  | 0.0067(3)                  | Al <sub>0.983(6)</sub> Fe <sub>0.017(6)</sub> |
| Zb   | 0.96283(8)     | 0.70185(9) | 0.63019(15)  | 0.0073(3)                  | Al <sub>0.925(6)</sub> Fe <sub>0.075(6)</sub> |
| Zc   | 1.07138(8)     | 0.70347(9) | 0.29740(16)  | 0.0062(3)                  | Al <sub>0.988(6)</sub> Fe <sub>0.012(6)</sub> |
| Zd   | 0.73777(7)     | 0.70158(8) | 0.63009(14)  | 0.0070(3)                  | Al <sub>0.876(6)</sub> Fe <sub>0.124(6)</sub> |
| Ze   | 0.96247(8)     | 0.26143(9) | 0.63078(15)  | 0.0068(3)                  | Al <sub>0.956(6)</sub> Fe <sub>0.044(6)</sub> |
| Zf   | 0.96465(7)     | 0.59496(8) | -0.03643(14) | 0.0067(3)                  | Al <sub>0.883(6)</sub> Fe <sub>0.117(6)</sub> |
| Ta   | 0.85779(7)     | 0.52351(8) | 0.35300(15)  | 0.0070(2)                  | Si <sub>1.00</sub>                            |
| Tb   | 0.66397(7)     | 0.52328(8) | 0.35205(15)  | 0.0069(2)                  | Si <sub>1.00</sub>                            |
| Tc   | 0.47666(7)     | 0.33581(8) | 0.35240(15)  | 0.0069(2)                  | Si <sub>1.00</sub>                            |
| Td   | 0.85724(7)     | 0.33594(8) | 0.35409(15)  | 0.0070(2)                  | Si <sub>1.00</sub>                            |
| Te   | 0.66378(7)     | 0.14232(8) | 0.35447(15)  | 0.0067(2)                  | Si <sub>1.00</sub>                            |
| Tf   | 0.47612(7)     | 0.14201(8) | 0.35397(15)  | 0.0068(2)                  | Si <sub>1.00</sub>                            |
| B1   | 0.7800(3)      | 0.8898(4)  | 0.4753(6)    | 0.0093(8)                  | B <sub>1.00</sub>                             |
| B2   | 0.7761(3)      | 0.5528(4)  | -0.1925(6)   | 0.0095(8)                  | B <sub>1.00</sub>                             |
| B3   | 0.1092(3)      | 0.8899(3)  | 0.4769(6)    | 0.0087(7)                  | B <sub>1.00</sub>                             |
| O1A  | 0.6668(3)      | 0.3312(3)  | 0.1290(5)    | 0.0270(8)                  | O <sub>1.00</sub>                             |
| O2A  | 0.5431(2)      | 0.2697(3)  | -0.1559(4)   | 0.0148(7)                  | O <sub>1.00</sub>                             |
| O2B  | 0.7273(2)      | 0.2714(3)  | -0.1527(4)   | 0.0149(6)                  | O <sub>1.00</sub>                             |
| O2C  | 0.7287(2)      | 0.4553(2)  | -0.1572(4)   | 0.0162(7)                  | O <sub>1.00</sub>                             |
| O3A  | 0.5329(2)      | 0.4659(2)  | -0.1365(4)   | 0.0158(7)                  | O <sub>1.00</sub>                             |
| H3A  | 0.543(4)       | 0.459(5)   | -0.265(4)    | 0.019                      | H <sub>1.00</sub>                             |
| O3B  | 0.8696(3)      | 0.7388(3)  | 0.5288(4)    | 0.0190(7)                  | O <sub>1.00</sub>                             |
| H3B  | 0.881(4)       | 0.761(5)   | 0.403(5)     | 0.023                      | H <sub>1.00</sub>                             |
| O3C  | 0.9282(3)      | 0.4628(3)  | -0.1378(4)   | 0.0182(7)                  | O <sub>1.00</sub>                             |
| H3C  | 0.925(4)       | 0.465(5)   | -0.268(4)    | 0.022                      | H <sub>1.00</sub>                             |
| O4A  | 0.7598(2)      | 0.5213(2)  | 0.4223(4)    | 0.0130(6)                  | O <sub>1.00</sub>                             |
| O4B  | 0.4799(2)      | 0.2408(2)  | 0.4228(4)    | 0.0142(6)                  | O <sub>1.00</sub>                             |
| O4C  | 0.7578(2)      | 0.2420(2)  | 0.4223(4)    | 0.0128(6)                  | O <sub>1.00</sub>                             |
| O5A  | 0.5735(2)      | 0.4266(2)  | 0.4436(4)    | 0.0121(6)                  | O <sub>1.00</sub>                             |
| O5B  | 0.5719(2)      | 0.1462(2)  | 0.4467(4)    | 0.0116(6)                  | O <sub>1.00</sub>                             |
| O5C  | 0.8529(2)      | 0.4276(2)  | 0.4456(4)    | 0.0125(6)                  | O <sub>1.00</sub>                             |
| O6A  | 0.8609(2)      | 0.5178(2)  | 0.1302(4)    | 0.0124(6)                  | O <sub>1.00</sub>                             |
| O6B  | 0.6555(2)      | 0.5195(2)  | 0.1293(4)    | 0.0117(6)                  | O <sub>1.00</sub>                             |
| O6C  | 0.6551(2)      | 0.1379(2)  | 0.1315(4)    | 0.0111(6)                  | O <sub>1.00</sub>                             |
| O6D  | 0.8624(2)      | 0.3444(2)  | 0.1308(4)    | 0.0100(5)                  | O <sub>1.00</sub>                             |
| O6E  | 0.4802(2)      | 0.3442(2)  | 0.1292(4)    | 0.0112(6)                  | O <sub>1.00</sub>                             |
| O6F  | 0.4812(2)      | 0.1385(2)  | 0.1307(4)    | 0.0121(6)                  | O <sub>1.00</sub>                             |
| O7A  | 0.6649(2)      | 0.6180(2)  | 0.4285(4)    | 0.0115(6)                  | O <sub>1.00</sub>                             |
| O7B  | 0.9515(2)      | 0.6197(2)  | 0.4285(4)    | 0.0104(6)                  | O <sub>1.00</sub>                             |
| O7C  | 0.6682(2)      | 0.0505(2)  | 0.4335(4)    | 0.0117(6)                  | O <sub>1.00</sub>                             |
| O7D  | 0.38004(19)    | 0.0491(2)  | 0.4309(4)    | 0.0106(6)                  | O <sub>1.00</sub>                             |
| O7E  | 0.3817(2)      | 0.3342(2)  | 0.4299(4)    | 0.0121(6)                  | O <sub>1.00</sub>                             |
| O7F  | 0.9491(2)      | 0.3322(2)  | 0.4330(4)    | 0.0119(6)                  | O <sub>1.00</sub>                             |
| O8A  | 0.8750(2)      | 0.6029(2)  | -0.2102(5)   | 0.0137(6)                  | O <sub>1.00</sub>                             |
| O8B  | 1.0607(2)      | 0.7908(2)  | 0.4587(4)    | 0.0132(6)                  | O <sub>1.00</sub>                             |
| O8C  | 1.2089(2)      | 0.9394(2)  | 0.4616(4)    | 0.0121(6)                  | O <sub>1.00</sub>                             |
| O8D  | 0.7286(2)      | 0.7910(2)  | 0.4551(5)    | 0.0133(6)                  | O <sub>1.00</sub>                             |
| O8E  | 1.0646(2)      | 0.6074(2)  | 0.1296(4)    | 0.0132(6)                  | O <sub>1.00</sub>                             |
| O8F  | 0.0587(2)      | 0.2686(2)  | 0.4614(5)    | 0.0137(6)                  | O <sub>1.00</sub>                             |

| Sample LUI-USA |              |             |              |                           |                                               |
|----------------|--------------|-------------|--------------|---------------------------|-----------------------------------------------|
| <i>Site</i>    | <i>x/a</i>   | <i>y/b</i>  | <i>z/c</i>   | <i>U<sub>eq/iso</sub></i> | <i>s.o.</i>                                   |
| X              | -0.00038(13) | 0.00022(14) | 0.2503(2)    | 0.0243(5)                 | Na <sub>0.889(6)</sub>                        |
| Ya             | 0.60436(5)   | 0.39476(5)  | -0.01194(10) | 0.0095(2)                 | Al <sub>0.751(4)</sub> Fe <sub>0.249(4)</sub> |
| Yb             | 0.78915(5)   | 0.39479(5)  | -0.01212(9)  | 0.00932(19)               | Al <sub>0.721(4)</sub> Fe <sub>0.279(4)</sub> |
| Yc             | 0.60405(5)   | 0.20934(6)  | -0.01034(10) | 0.0089(2)                 | Al <sub>0.832(4)</sub> Fe <sub>0.168(4)</sub> |
| Za             | 0.63035(6)   | 0.70283(6)  | 0.29618(11)  | 0.0060(2)                 | Al <sub>0.984(4)</sub> Fe <sub>0.016(4)</sub> |
| Zb             | 0.96291(6)   | 0.70214(6)  | 0.62925(11)  | 0.0071(2)                 | Al <sub>0.942(4)</sub> Fe <sub>0.058(4)</sub> |
| Zc             | 1.07121(6)   | 0.70288(6)  | 0.29591(11)  | 0.0061(2)                 | Al <sub>0.978(4)</sub> Fe <sub>0.022(4)</sub> |
| Zd             | 0.73790(6)   | 0.70223(6)  | 0.62895(11)  | 0.0068(2)                 | Al <sub>0.954(4)</sub> Fe <sub>0.046(4)</sub> |
| Ze             | 0.96274(6)   | 0.26138(6)  | 0.62907(11)  | 0.0064(2)                 | Al <sub>0.958(4)</sub> Fe <sub>0.042(4)</sub> |
| Zf             | 0.96399(6)   | 0.59475(6)  | -0.03778(11) | 0.0066(2)                 | Al <sub>0.958(4)</sub> Fe <sub>0.042(4)</sub> |
| Ta             | 0.85775(5)   | 0.52348(6)  | 0.35171(10)  | 0.00635(14)               | Si <sub>1.00</sub>                            |
| Tb             | 0.66422(5)   | 0.52328(6)  | 0.35142(10)  | 0.00675(14)               | Si <sub>1.00</sub>                            |
| Tc             | 0.47711(5)   | 0.33578(6)  | 0.35258(10)  | 0.00693(14)               | Si <sub>1.00</sub>                            |
| Td             | 0.85727(5)   | 0.33575(6)  | 0.35300(10)  | 0.00633(14)               | Si <sub>1.00</sub>                            |
| Te             | 0.66422(5)   | 0.14240(6)  | 0.35406(10)  | 0.00596(14)               | Si <sub>1.00</sub>                            |
| Tf             | 0.47671(5)   | 0.14236(6)  | 0.35411(10)  | 0.00610(14)               | Si <sub>1.00</sub>                            |
| B1             | 0.7795(2)    | 0.8896(2)   | 0.4731(5)    | 0.0095(5)                 | B <sub>1.00</sub>                             |
| B2             | 0.7752(2)    | 0.5518(2)   | -0.1942(4)   | 0.0091(5)                 | B <sub>1.00</sub>                             |
| B3             | 0.1088(2)    | 0.8897(2)   | 0.4736(4)    | 0.0085(5)                 | B <sub>1.00</sub>                             |
| O1A            | 0.66472(18)  | 0.33179(19) | 0.1225(3)    | 0.0161(4)                 | O <sub>1.00</sub>                             |
| O2A            | 0.54422(15)  | 0.27123(17) | -0.1545(3)   | 0.0128(4)                 | O <sub>1.00</sub>                             |
| O2B            | 0.72534(16)  | 0.27064(17) | -0.1543(3)   | 0.0129(4)                 | O <sub>1.00</sub>                             |
| O2C            | 0.72590(17)  | 0.45408(17) | -0.1576(3)   | 0.0142(4)                 | O <sub>1.00</sub>                             |
| O3A            | 0.53517(16)  | 0.46166(18) | -0.1361(3)   | 0.0160(5)                 | O <sub>1.00</sub>                             |
| H3A            | 0.538(3)     | 0.460(3)    | -0.267(3)    | 0.019                     | H <sub>1.00</sub>                             |
| O3B            | 0.87167(17)  | 0.74410(19) | 0.5289(3)    | 0.0173(5)                 | O <sub>1.00</sub>                             |
| H3B            | 0.873(3)     | 0.751(3)    | 0.402(3)     | 0.021                     | H <sub>1.00</sub>                             |
| O3C            | 0.92600(19)  | 0.46172(18) | -0.1367(3)   | 0.0171(5)                 | O <sub>1.00</sub>                             |
| H3C            | 0.921(3)     | 0.459(3)    | -0.263(3)    | 0.02                      | H <sub>1.00</sub>                             |
| O4A            | 0.76036(15)  | 0.52217(17) | 0.4240(3)    | 0.0132(4)                 | O <sub>1.00</sub>                             |
| O4B            | 0.48136(17)  | 0.24129(16) | 0.4247(3)    | 0.0138(4)                 | O <sub>1.00</sub>                             |
| O4C            | 0.75847(15)  | 0.24137(16) | 0.4242(3)    | 0.0129(4)                 | O <sub>1.00</sub>                             |
| O5A            | 0.57432(15)  | 0.42622(16) | 0.4445(3)    | 0.0119(4)                 | O <sub>1.00</sub>                             |
| O5B            | 0.57278(14)  | 0.14724(17) | 0.4479(3)    | 0.0114(4)                 | O <sub>1.00</sub>                             |
| O5C            | 0.85062(16)  | 0.42639(16) | 0.4455(3)    | 0.0117(4)                 | O <sub>1.00</sub>                             |
| O6A            | 0.85963(15)  | 0.51687(17) | 0.1294(3)    | 0.0115(4)                 | O <sub>1.00</sub>                             |
| O6B            | 0.65548(15)  | 0.51660(16) | 0.1290(3)    | 0.0113(4)                 | O <sub>1.00</sub>                             |
| O6C            | 0.65564(15)  | 0.14031(16) | 0.1314(3)    | 0.0102(4)                 | O <sub>1.00</sub>                             |
| O6D            | 0.86132(15)  | 0.34389(16) | 0.1302(3)    | 0.0092(4)                 | O <sub>1.00</sub>                             |
| O6E            | 0.48191(15)  | 0.34421(16) | 0.1300(3)    | 0.0095(4)                 | O <sub>1.00</sub>                             |
| O6F            | 0.48337(15)  | 0.14075(17) | 0.1320(3)    | 0.0107(4)                 | O <sub>1.00</sub>                             |
| O7A            | 0.66444(15)  | 0.61809(15) | 0.4259(3)    | 0.0105(4)                 | O <sub>1.00</sub>                             |
| O7B            | 0.95222(14)  | 0.61841(15) | 0.4263(3)    | 0.0100(4)                 | O <sub>1.00</sub>                             |
| O7C            | 0.66808(14)  | 0.05019(15) | 0.4304(3)    | 0.0101(4)                 | O <sub>1.00</sub>                             |
| O7D            | 0.38063(14)  | 0.04971(16) | 0.4300(3)    | 0.0100(4)                 | O <sub>1.00</sub>                             |
| O7E            | 0.38230(14)  | 0.33404(16) | 0.4297(3)    | 0.0120(4)                 | O <sub>1.00</sub>                             |
| O7F            | 0.94974(15)  | 0.33335(16) | 0.4310(3)    | 0.0123(4)                 | O <sub>1.00</sub>                             |
| O8A            | 0.87456(15)  | 0.60185(17) | -0.2095(3)   | 0.0132(4)                 | O <sub>1.00</sub>                             |
| O8B            | 1.06112(15)  | 0.79122(16) | 0.4552(3)    | 0.0121(4)                 | O <sub>1.00</sub>                             |
| O8C            | 1.20840(14)  | 0.93999(16) | 0.4614(3)    | 0.0111(4)                 | O <sub>1.00</sub>                             |
| O8D            | 0.72902(15)  | 0.79123(16) | 0.4538(3)    | 0.0123(4)                 | O <sub>1.00</sub>                             |
| O8E            | 1.06377(15)  | 0.60702(16) | 0.1282(3)    | 0.0115(4)                 | O <sub>1.00</sub>                             |
| O8F            | 0.05931(15)  | 0.26889(16) | 0.4583(3)    | 0.0129(4)                 | O <sub>1.00</sub>                             |
